# Supplementary material for: Development of a Flexible Sensor-Integrated Tissue Patch to Monitor Early Organ Rejection Processes Using Impedance Spectroscopy
Source: MDPI journal article supplement (doi:10.3390/bios14050253), 2024-05-17
Supplement: s1 [file s1]

# Development of a flexible sensor-integrated tissue patch to monitor early organ rejection processes using impedance spectroscopy

Peter Ertl <sup>1&</sup>, Tibor Wladimir <sup>1&</sup>, Drago Sticker <sup>1&</sup>, Patrick Schuller <sup>1</sup>, Mario Rothbauer <sup>1,2,\*</sup>, Gregor Wieselthaler <sup>3</sup> and Martin Frauenlob <sup>1,\*</sup>

<sup>1</sup> Institute of Applied Synthetic Chemistry, Faculty of Technical Chemistry, Vienna University of Technology, Getreidemarkt 9/163, 1060 Vienna, Austria

<sup>2</sup> Karl Chiari Lab for Orthopaedic Biology, Department of Orthopedics and Trauma Surgery, Medical University of Vienna, Währinger Gürtel 18-22, 1090 Vienna, Austria

<sup>3</sup> University of California, Department of Surgery, Division of Cardiothoracic Surgery, San Francisco, CA

\* Correspondence: martin.frauenlob@tuwien.ac.at; mario.rothbauer@tuwien.ac.at

& Authors contributed equally

Content: Figure S1, Figure S2

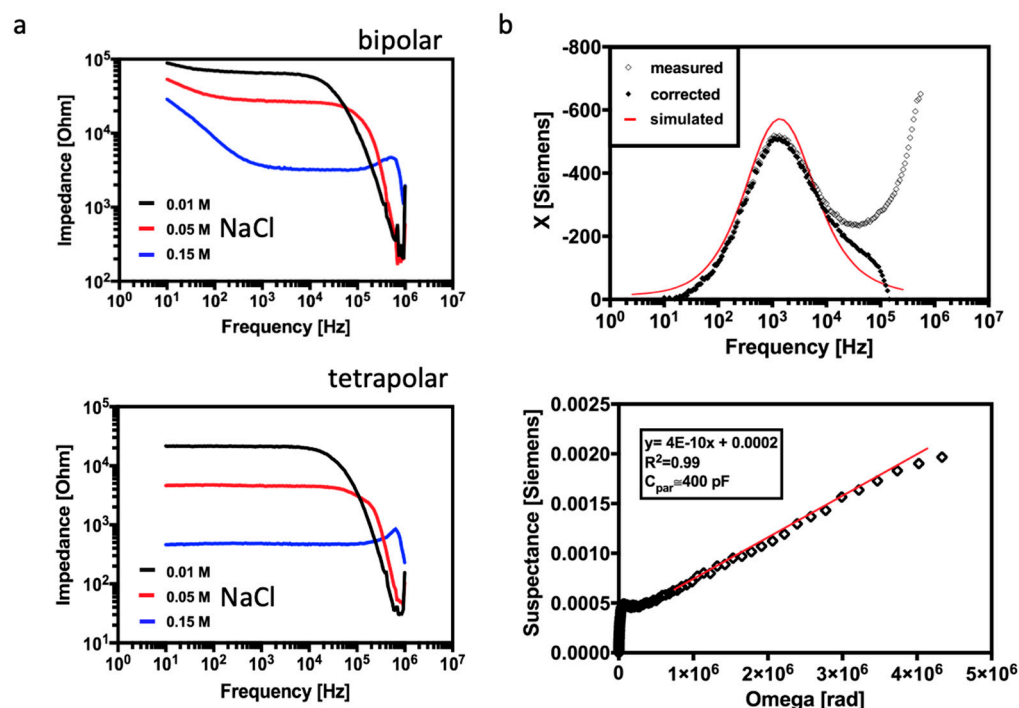

**Figure S1.** Comparison of sensor response to sodium chloride solutions in the range of 0.01–0.15 M for (a) impedance and (b) susceptance (X) of bipolar (top) versus tetrapolar (bottom) electrode set-ups.

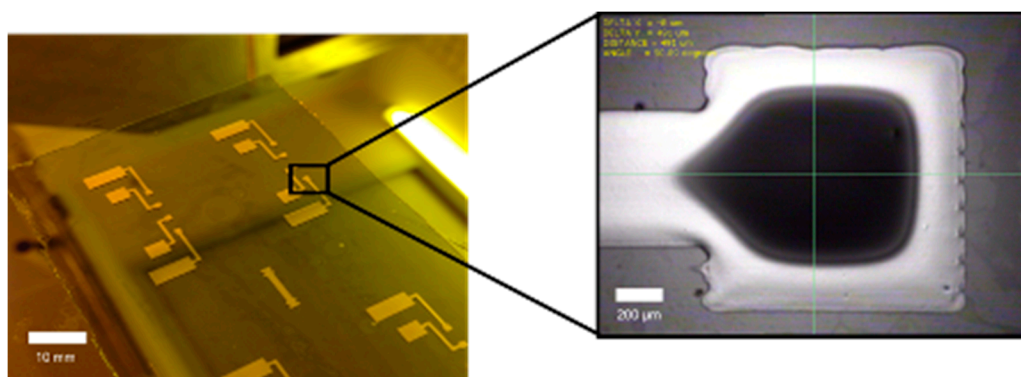

**Figure S2.** Example for rapid prototyped electrode leads on functionalized PDMS silicone substrates prior to TiOx attachment and back-end processing.

**Disclaimer/Publisher's Note:** The statements, opinions and data contained in all publications are solely those of the individual author(s) and contributor(s) and not of MDPI and/or the editor(s). MDPI and/or the editor(s) disclaim responsibility for any injury to people or property resulting from any ideas, methods, instructions or products referred to in the content.
